# Supplementary material for: Racial Disparities in Adverse Cardiovascular Outcomes After a Myocardial Infarction in Young or Middle‐Aged Patients
Source: PubMed Central journal article supplement — J Am Heart Assoc. 2021 Aug 25;10(17):e020828. doi: 10.1161/JAHA.121.020828 (PMC8649258; doi:10.1161/jaha.121.020828), 2021-08-25
Supplement: JAH3-10-e020828-s001.pdf [file JAH3-10-e020828-s001.pdf]

# **SUPPLEMENTAL MATERIAL**

**Table S1. Descriptive characteristics of clinical risk factors stratified by income category (N=278) in the Myocardial Infarction and Mental Stress 2 Study (MIMS2) at baseline.**

| <b>Variable</b>                                             | <b>&lt;35K<br/>(n=141)</b> | <b>35K-75K<br/>(n=74)</b> | <b>&gt;75K<br/>(n=63)</b> |
|-------------------------------------------------------------|----------------------------|---------------------------|---------------------------|
| <b>Baseline demographics</b>                                |                            |                           |                           |
| Age, y, mean (SD)                                           | 51 (7)                     | 51 (7)                    | 52 (5)                    |
| Female, %                                                   | 57                         | 49                        | 40                        |
| Married/living with partner, %                              | 26                         | 46                        | 84                        |
| Education >12 y, %                                          | 46                         | 66                        | 92                        |
| Employed, %                                                 | 24                         | 58                        | 86                        |
| <b>Clinical Risk Factors</b>                                |                            |                           |                           |
| BMI (kg/m <sup>2</sup> ), mean (SD)                         | 32 (7)                     | 32 (7)                    | 30 (7)                    |
| Ever smoker, %                                              | 66                         | 41                        | 41                        |
| History of hypertension, %                                  | 90                         | 78                        | 64                        |
| History of dyslipidemia, %                                  | 82                         | 79                        | 79                        |
| History of diabetes mellitus, %                             | 43                         | 28                        | 13                        |
| History of congestive heart failure, %                      | 12                         | 9                         | 0                         |
| History of stroke, %                                        | 8                          | 1                         | 2                         |
| History of CABG, %                                          | 22                         | 23                        | 16                        |
| History of PTCA, %                                          | 69                         | 74                        | 70                        |
| <b>Coronary angiography and electrocardiography results</b> |                            |                           |                           |
| Gensini severity score, mean (SD)                           | 42 (47)                    | 39 (37)                   | 44 (50)                   |
| Obstructive CAD (stenosis $\geq$ 70%), %                    | 83                         | 89                        | 85                        |
| 3-Vessel disease (at $\geq$ 70%), %                         | 16                         | 11                        | 13                        |
| LV ejection fraction, mean (SD)                             | 52 (12)                    | 50 (13)                   | 52 (11)                   |
| ST-segment elevation MI, %                                  | 26                         | 32                        | 35                        |
| <b>Medication use</b>                                       |                            |                           |                           |
| Beta-blocker, %                                             | 87                         | 89                        | 76                        |
| Statin, %                                                   | 84                         | 77                        | 95                        |
| Aspirin, %                                                  | 83                         | 70                        | 92                        |
| P2Y12 inhibitors, %                                         | 67                         | 72                        | 74                        |
| ACE inhibitors, %                                           | 52                         | 38                        | 9                         |
| Anti-diabetics, %                                           | 36                         | 26                        | 15                        |
| Antidepressants, %                                          | 18                         | 22                        | 13                        |
| <b>Psychosocial risk factors</b>                            |                            |                           |                           |
| Beck Depression inventory, mean (SD)                        | 16 (11)                    | 10 (8)                    | 7 (8)                     |
| PTSD Symptom Checklist, mean (SD)                           | 37 (16)                    | 29 (11)                   | 25 (10)                   |
| Anger Expression Inventory, mean (SD)                       | 33 (14)                    | 30 (12)                   | 25 (12)                   |
| Anxiety State Inventory, mean (SD)                          | 40 (14)                    | 34 (11)                   | 30 (11)                   |
| Perceived Stress Scale, mean (SD)                           | 19 (8)                     | 15 (8)                    | 11 (8)                    |
| Hostility Scale, mean (SD)                                  | 21 (9)                     | 18 (8)                    | 13 (7)                    |
| Composite distress score, mean (SD)                         | 166 (64)                   | 135 (57)                  | 96 (51)                   |

BMI=body mass index, SD=standard deviation, MI= myocardial infarction
